# Supplementary material for: Mid‐ to Late‐Life Time‐Averaged Cumulative Blood Pressure and Late‐Life Retinal Microvasculature: The ARIC Study
Source: PubMed Central journal article supplement — J Am Heart Assoc. 2022 Jul 25;11(15):e25226. doi: 10.1161/JAHA.122.025226 (PMC9375499; doi:10.1161/jaha.122.025226), 2022-07-25

## **SUPPLEMENTAL MATERIAL**

**Table S1.** Comparison of people included and excluded at visit 5 (2011-2013).

| Characteristics          | Included in<br>analyses (n=1818) | Excluded from<br>analyses (n=4720) | <i>P</i> -value |
|--------------------------|----------------------------------|------------------------------------|-----------------|
| Age, y                   | 76.7 (5.2)                       | 75.4 (5.2)                         | <0.001          |
| Female (%)               | 56.1                             | 58.4                               | 0.047           |
| Black (%)                | 17.1                             | 21.9                               | <0.001          |
| BMI (kg/m <sup>2</sup> ) | 28.4 (5.6)                       | 28.9 (5.8)                         | 0.003           |
| Current smoking          | 4.5%                             | 6.2%                               | <0.001          |
| Current drinking         | 50.2                             | 50.7                               | 0.075           |
| SBP (mmHg)               | 129.9 (18.0)                     | 130.6 (18.5)                       | 0.155           |
| DBP (mmHg)               | 65.2 (10.5)                      | 66.7 (10.9)                        | <0.001          |
| Triglycerides (mg/dl)    | 1.4 (0.6)                        | 1.4 (0.8)                          | 0.095           |
| LDL (mg/dl)              | 2.7 (0.9)                        | 2.7 (0.9)                          | 0.067           |
| HDL (mg/dl)              | 1.3 (0.4)                        | 1.3 (0.4)                          | 0.796           |
| TC (mg/dl)               | 4.6 (1.1)                        | 4.7 (1.1)                          | 0.086           |
| FBG (mmol/l)             | 6.3 (1.5)                        | 6.3 (1.6)                          | 0.234           |
| Diabetes (%)             | 29.8                             | 29.9                               | 0.910           |
| Hypertension (%)         | 74.3                             | 74.1                               | 0.878           |

Continuous variables are presented as mean (SD). *P* values were calculated by unpaired *t* test or  $\chi^2$  test. Abbreviations: SD, standard deviation; SBP, systolic blood pressure; DBP, diastolic blood pressure; LDL, low-density lipoprotein; HDL, high-density lipoprotein; TC, total cholesterol; FBG, fasting blood glucose.

**Table S2.** Relationship of time-averaged cumulative blood pressure with generalized arteriolar narrowing defined as narrowest quintile of CRAE.

|                    | Generalized arteriolar narrowing |          |                    | Generalized arteriolar narrowing |          |
|--------------------|----------------------------------|----------|--------------------|----------------------------------|----------|
|                    | Adjusted OR (95% CI)             | <i>P</i> |                    | Adjusted OR (95% CI)             | <i>P</i> |
| Cumulative SBP     |                                  |          | Cumulative DBP     |                                  |          |
| Lowest quintile    | 1.00 (reference)                 | -        | Lowest quintile    | 1.00 (reference)                 | -        |
| Second quintile    | 1.26 (0.84, 1.87)                | 0.268    | Second quintile    | 1.40 (0.94, 2.10)                | 0.102    |
| Third quintile     | 1.74 (1.16, 2.61)                | 0.007    | Third quintile     | 1.41 (0.94, 2.13)                | 0.096    |
| Fourth quintile    | 1.39 (0.90, 2.14)                | 0.178    | Fourth quintile    | 2.32 (1.54, 3.49)                | <0.001   |
| Highest quintile   | 1.24 (0.79, 1.96)                | 0.383    | Highest quintile   | 1.97 (1.27, 3.05)                | 0.002    |
| <i>P</i> for trend |                                  | 0.399    | <i>P</i> for trend |                                  | <0.001   |
| Per 1 SD           | 1.06 (0.92, 1.22)                | 0.443    | Per 1 SD           | 1.25 (1.09, 1.43)                | 0.001    |

Analyses were adjusted for age, sex, race, body mass index, visit center, smoking status, drinking status, triglycerides, low-density lipoprotein, high-density lipoprotein, prevalence of diabetes, prevalence of hypertension, and antihypertensive medication at visit 5.

Abbreviations: SD, standard deviation; SBP, systolic blood pressure; DBP, diastolic blood pressure; CRAE, central retinal arteriolar equivalent.

**Figure S1. Definition of time-averaged cumulative systolic blood pressure (SBP).**

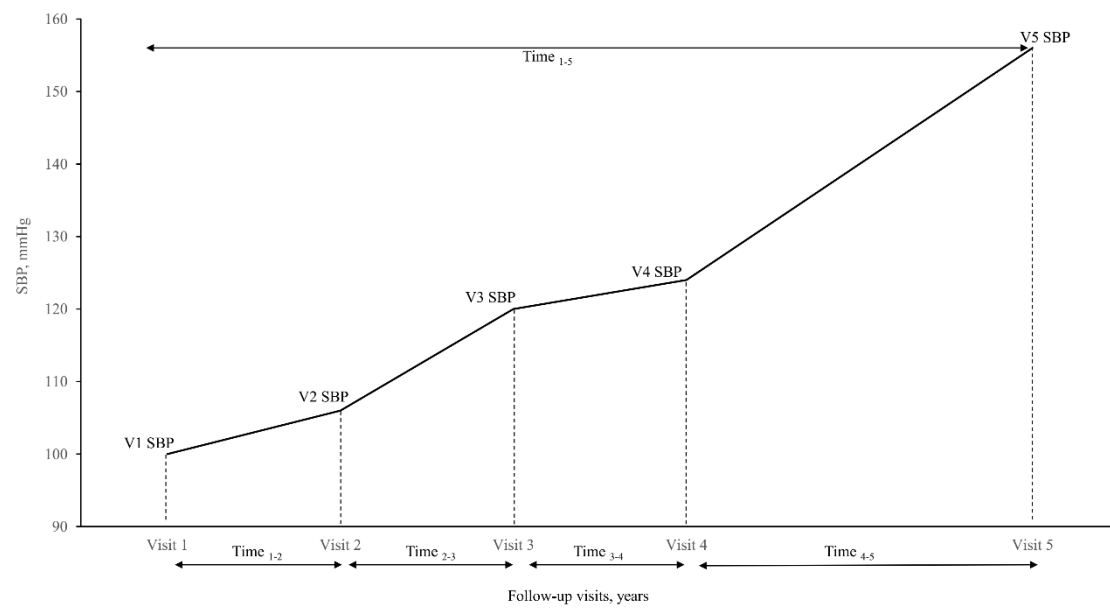

Time-averaged cumulative SBP over the 5 study visits was area under the curve index to total expose time (time 1-5)

Examples:

One patient's SBP was 100mmHg, 106mmHg,120mmHg,124mmHg, and 156mmHg, respectively, from visit1 to visit5 (Y<sub>1987</sub>, Y<sub>1990</sub>, Y<sub>1993</sub>, Y<sub>1996</sub>, Y<sub>2011</sub>)

$$\text{Time-averaged cumulative SBP} = [3 \cdot (100 + 106)/2 + 3 \cdot (106 + 120)/2 + 3 \cdot (120 + 124)/2 + 15 \cdot (124 + 156)/2] \div 24 = 129.8 \text{ mmHg}$$

**Figure S2. Unadjusted mean systolic blood pressure (SBP), and diastolic blood pressure (DBP) values with increasing age for whites and blacks.**

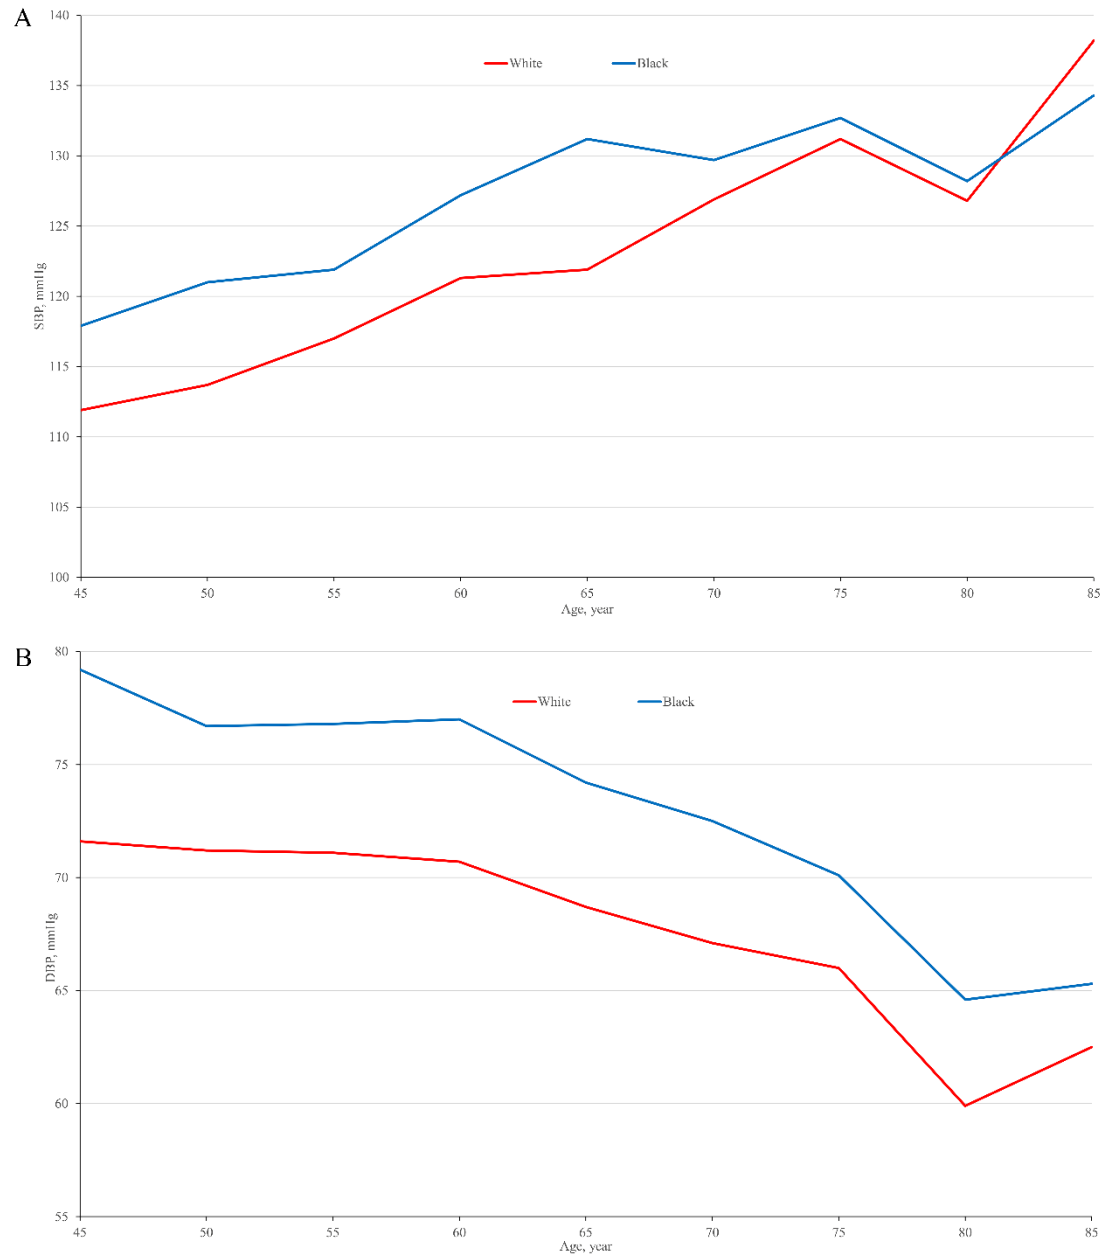

**Figure S3. Relationship between time-averaged cumulative blood pressure and CRVE, stratified by race.** Model was unadjusted and 95% confidence interval was displayed by dashed lines. Abbreviation: CRVE, central retinal venular equivalent; SBP, systolic blood pressure; DBP, diastolic blood pressure.

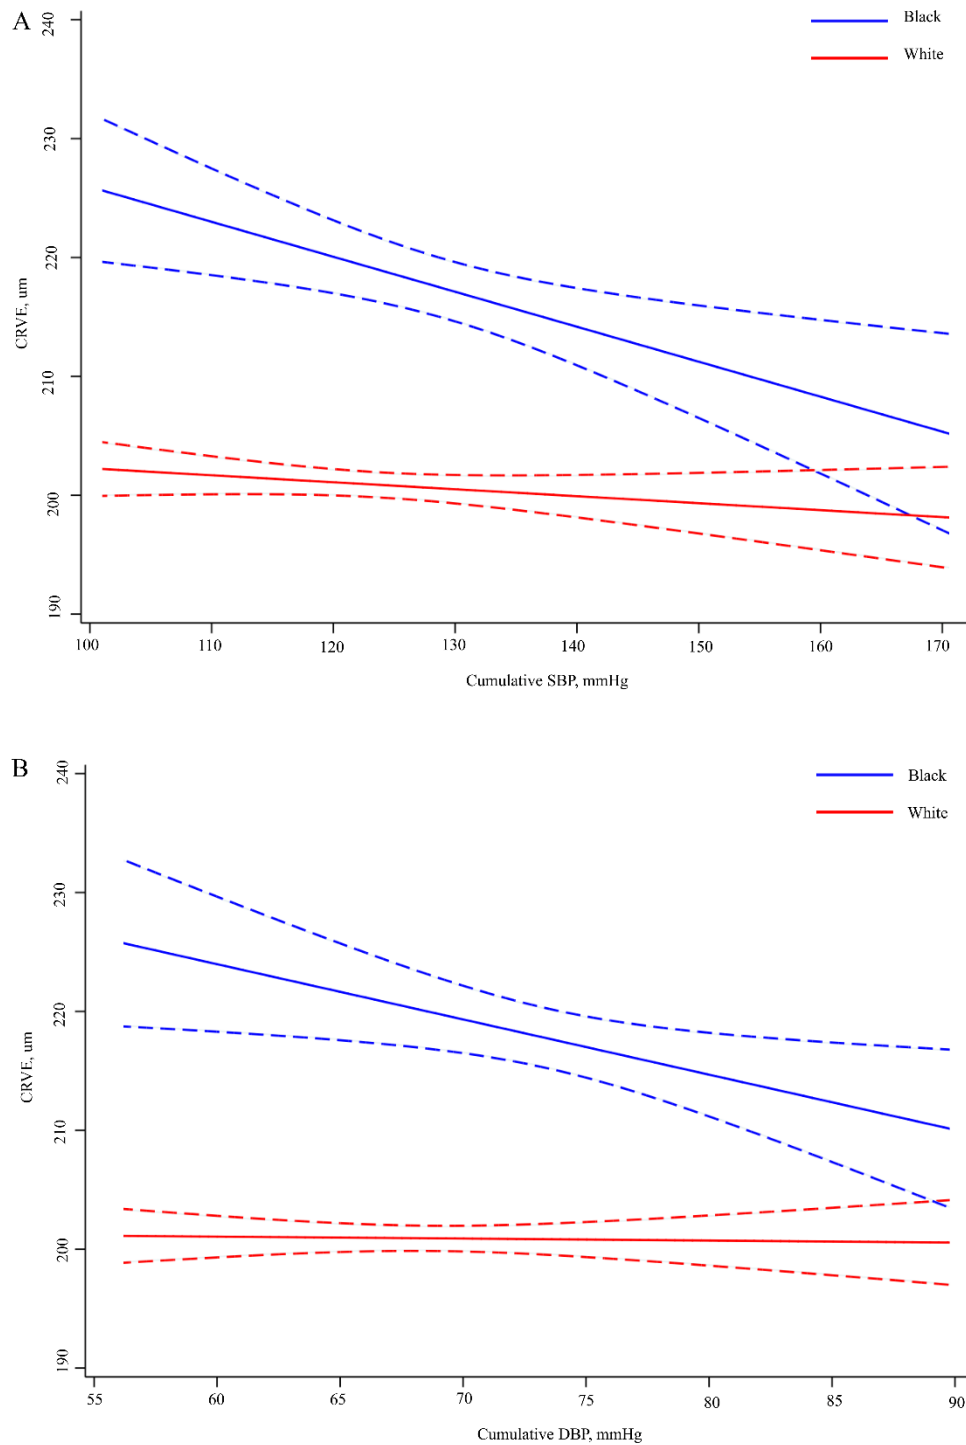

**Figure S4. Association between cumulative blood pressure over 25 years with retinal phenotypes, stratified by diabetes.** The  $\beta$  represents unstandardized regression coefficients. Retinal phenotypes were transformed to z-scores. All analyses were adjusted for age, sex, race, body mass index, visit center, smoking status, drinking status, triglycerides, low-density lipoprotein, high-density lipoprotein, prevalence of diabetes, prevalence of hypertension, and antihypertensive medication at visit 5. Abbreviations: SBP, systolic blood pressure; DBP, diastolic blood pressure; CRAE, central retinal arteriolar equivalent; CRVE, central retinal venular equivalent; AVR, arteriole: venule ratio.

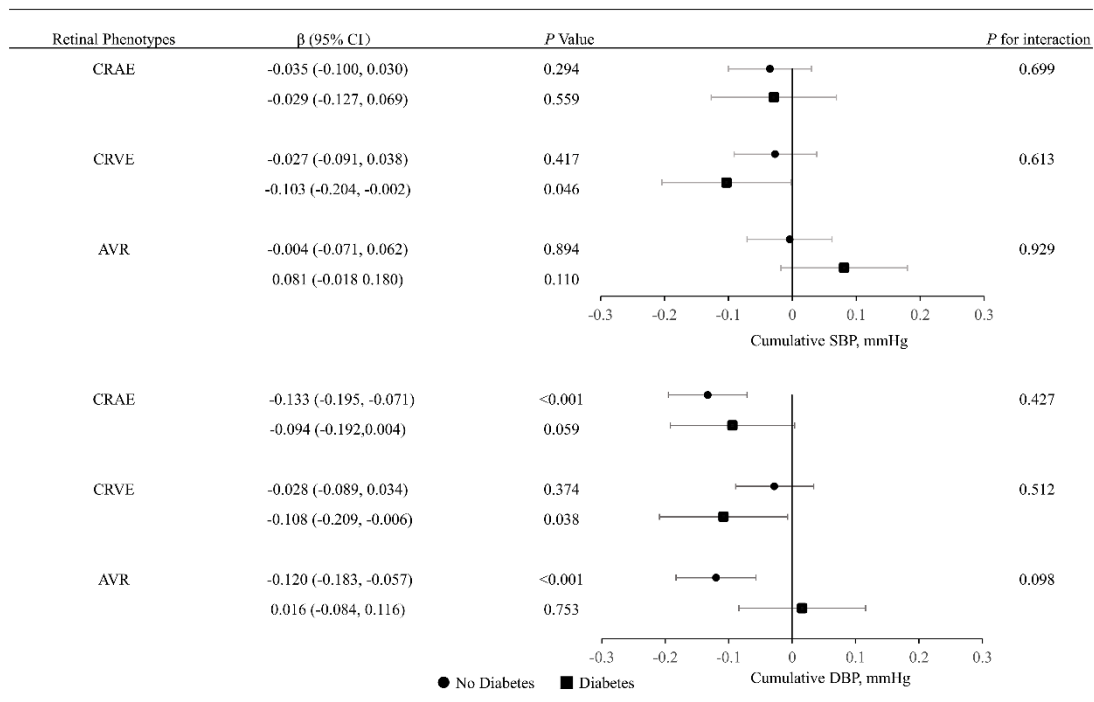

**Figure S5. Association between cumulative blood pressure over 25 years with retinal phenotypes, stratified by hypertension.** The  $\beta$  represents unstandardized regression coefficients. Retinal phenotypes were transformed to z-scores. All analyses were adjusted for age, sex, race, body mass index, visit center, smoking status, drinking status, triglycerides, low-density lipoprotein, high-density lipoprotein, prevalence of diabetes, prevalence of hypertension, and antihypertensive medication at visit 5. Abbreviations: SBP, systolic blood pressure; DBP, diastolic blood pressure; CRAE, central retinal arteriolar equivalent; CRVE, central retinal venular equivalent; AVR, arteriole: venule ratio.

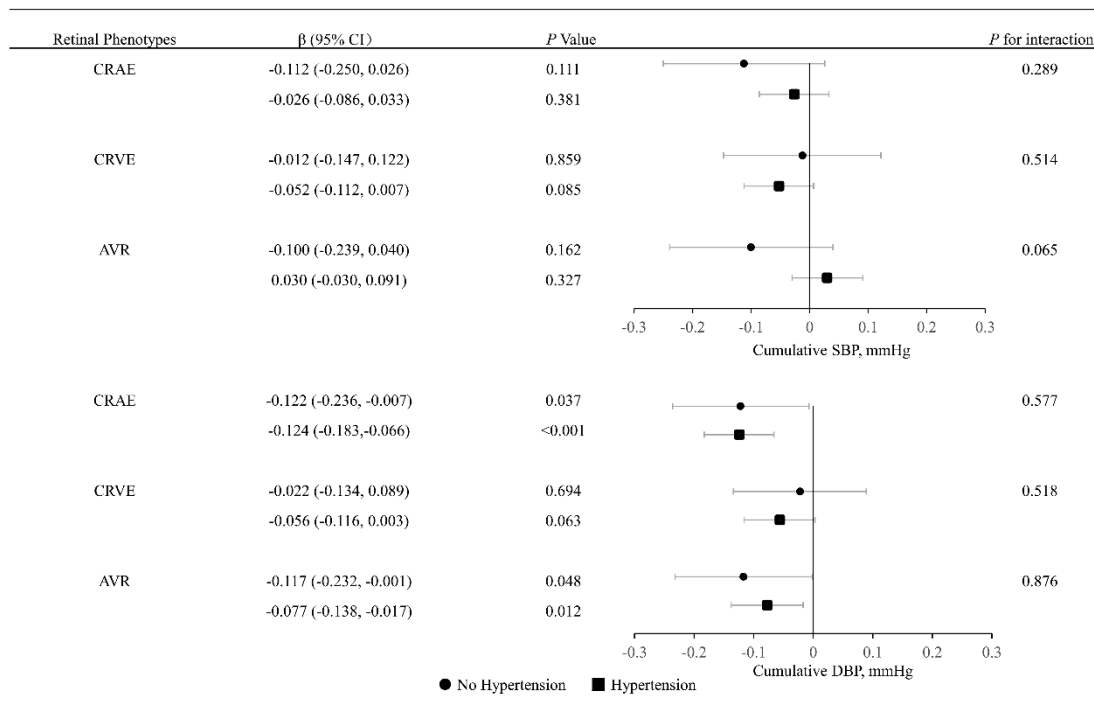

Supplement: JAH3-11-0e25226-s001.pdf [file JAH3-11-0e25226-s001.pdf]
